# Supplementary material for: Panchromatic aza-Bodipy based π-conjugates
Source: Royal Society of Chemistry journal article supplement (doi:10.1039/d1nj00847a), 2021-01-01

## Supporting Information

### Panchromatic aza-Bodipy based $\pi$ -conjugates

Thumuganti Gayathri,<sup>a,c</sup> Ravulakollu Srinivasa Rao,<sup>a,c</sup> Vinay Gupta,<sup>b,c</sup> and Surya Prakash Singh<sup>\*a,c</sup>

<sup>a</sup>Polymers and Functional Materials Division, CSIR-Indian Institute of Chemical Technology (IICT), Uppal Road, Tarnaka, Hyderabad, 500007, India.

<sup>b</sup>CSIR-National Physical Laboratory, New Delhi-110012, India.

<sup>c</sup>Academy of Scientific and Innovative Research (AcSIR), Ghaziabad, Uttar Pradesh, India.

| <b>Contents</b>                                 | <b>Page No.</b> |
|-------------------------------------------------|-----------------|
| 1. Cyclic voltammograms of Aza-Bodipy dyes..... | S2              |
| 2. Density functional theory calculations.....  | S2-S3           |
| 3. NMR Spectra.....                             | S4-S6           |
| 4. MALDI-TOF Spectra.....                       | S7-S8           |

## 1. Cyclic voltammograms of Aza-Bodipy dyes

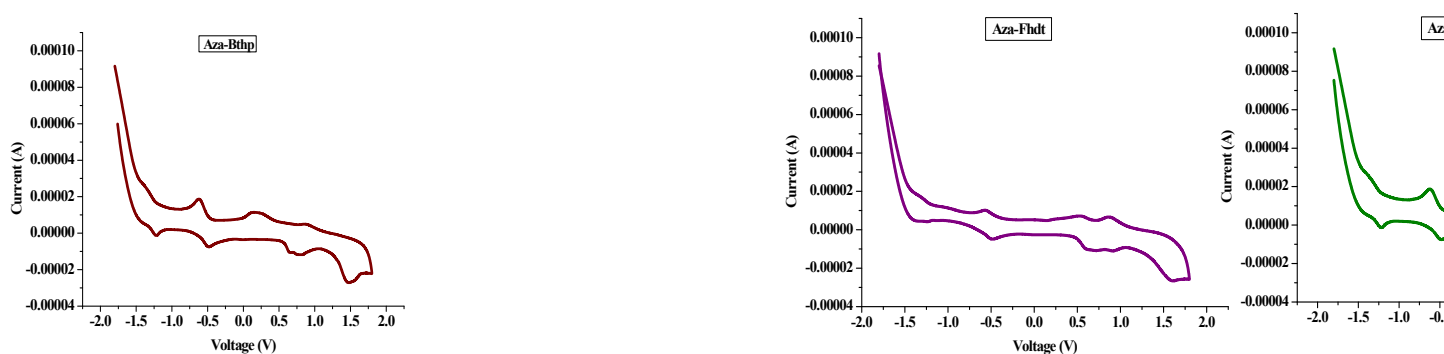

**Figure S1** Cyclic voltammograms of Aza-Bthp, Aza-Fhdt and Aza-Sty dyes measured at a scan rate of 100 mV sec<sup>-1</sup>.

## 2. Density functional theory - Calculations:

**Table S1.** Major allowed transitions for the dye Aza-Bthp; calculated by B3LYP/6-311g (d,p) level of theory in chloroform solvent.

| Excited State | Wavelength (nm) | Osc.Strength (f) | Maj.contribution                                  |
|---------------|-----------------|------------------|---------------------------------------------------|
| S1            | 805             | 0.7752           | HOMO->LUMO (99%)                                  |
| S2            | 680             | 0.5776           | H-2->LUMO (46%), H-1->LUMO (53%)                  |
| S3            | 679             | 0.7017           | H-2->LUMO (52%), H-1->LUMO (47%)                  |
| S4            | 585             | 0.0255           | H-3->LUMO (98%)                                   |
| S5            | 501             | 0.157            | H-4->LUMO (94%)                                   |
| S6            | 433             | 0.6899           | HOMO->L+1 (97%)                                   |
| S7            | 418             | 0.0086           | HOMO->L+2 (96%)                                   |
| S8            | 388             | 0.0673           | H-7->LUMO (57%), H-1->L+1 (22%)                   |
| S9            | 383             | 0.897            | H-2->L+1 (59%), H-1->L+1 (16%)                    |
| S10           | 382             | 0.2057           | H-7->LUMO (15%), H-2->L+1 (19%),<br>H-1>L+1 (50%) |

**Table S2.** Major allowed transitions for the dye Aza-Fhdt; calculated by B3LYP/6-311g (d,p) level of theory in chloroform solvent.

| Excited State | Wavelength (nm) | Osc.Strength (f) | Maj.Contribution                                                   |
|---------------|-----------------|------------------|--------------------------------------------------------------------|
| S1            | 854             | 0.6597           | HOMO->LUMO (100%)                                                  |
| S2            | 734             | 0.7902           | H-2->LUMO (13%), H-1->LUMO (84%)                                   |
| S3            | 707             | 0.3793           | H-2->LUMO (84%), H-1->LUMO (13%)                                   |
| S4            | 606             | 0.239            | H-3->LUMO (95%), H-1->LUMO (3%)                                    |
| S5            | 521             | 0.1882           | H-4->LUMO (93%), H-2->LUMO (3%)                                    |
| S6            | 421             | 0.3824           | H-5->LUMO (50%), HOMO->L+1 (43%)                                   |
| S7            | 417             | 1.2911           | H-5->LUMO (45%), HOMO->L+1 (46%)                                   |
| S8            | 402             | 0.0391           | H-1->L+1 (17%), HOMO->L+2 (72%)                                    |
| S9            | 384             | 0.1373           | H-9->LUMO (13%), H-6->LUMO (66%)                                   |
| S10           | 383             | 0.0102           | H-2->L+3 (12%), H-1->L+1 (17%),<br>H-1->L+3 (20%), HOMO->L+3 (29%) |

**Table S3.** Major allowed transitions for the dye Aza-Sty; calculated by B3LYP/6-311g (d,p) level of theory in chloroform solvent.

| Excited State | Wavelength (nm) | Osc.Strength (f) | Wavelength (nm)                     |
|---------------|-----------------|------------------|-------------------------------------|
| S1            | 796             | 0.7042           | HOMO->LUMO (98%)                    |
| S2            | 664             | 0.9952           | H-1->LUMO (99%)                     |
| S3            | 645             | 0.2658           | H-2->LUMO (97%)                     |
| S4            | 522             | 0.1868           | H-3->LUMO (96%)                     |
| S5            | 455             | 0.061            | H-4->LUMO (91%)                     |
| S6            | 424             | 0.8032           | HOMO->L+1 (96%)                     |
| S7            | 409             | 0.0013           | HOMO->L+2 (95%)                     |
| S8            | 385             | 0.021            | H-5->LUMO (84%)                     |
| S9            | 375             | 0.002            | H-6->LUMO (94%)                     |
| S10           | 374             | 0.0043           | H-8->LUMO (10%),<br>H-7->LUMO (78%) |

### 3. NMR Spectra

#### 3.1a <sup>1</sup>H NMR Spectrum of Aza-Bthp in CDCl<sub>3</sub>

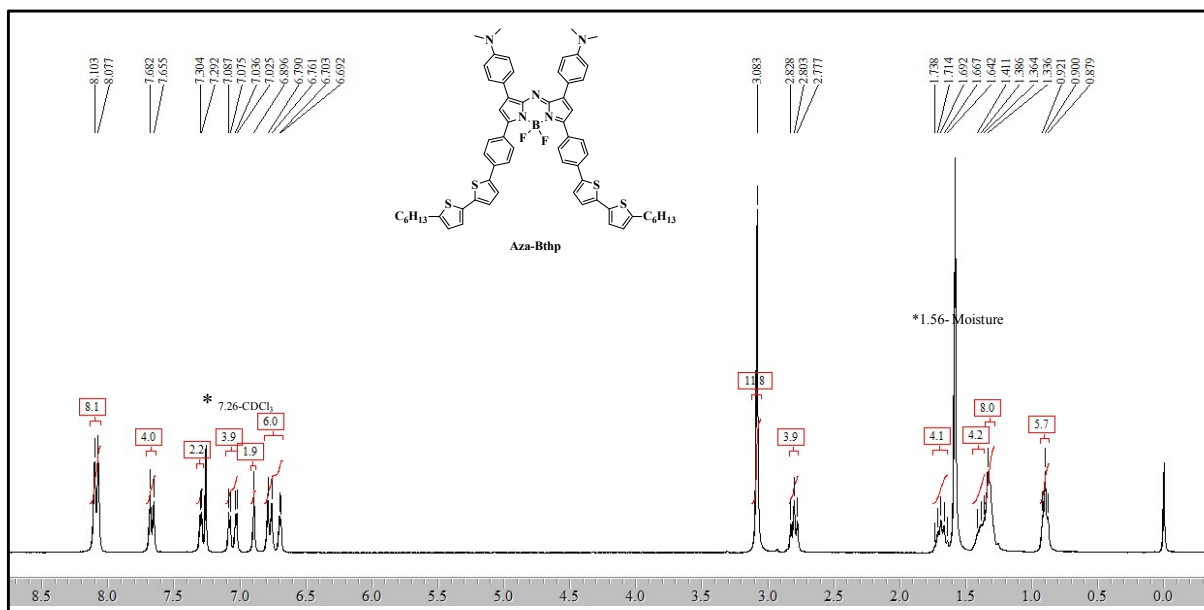

#### 3.1b <sup>13</sup>C NMR Spectrum of Aza-Bthp in CDCl<sub>3</sub>

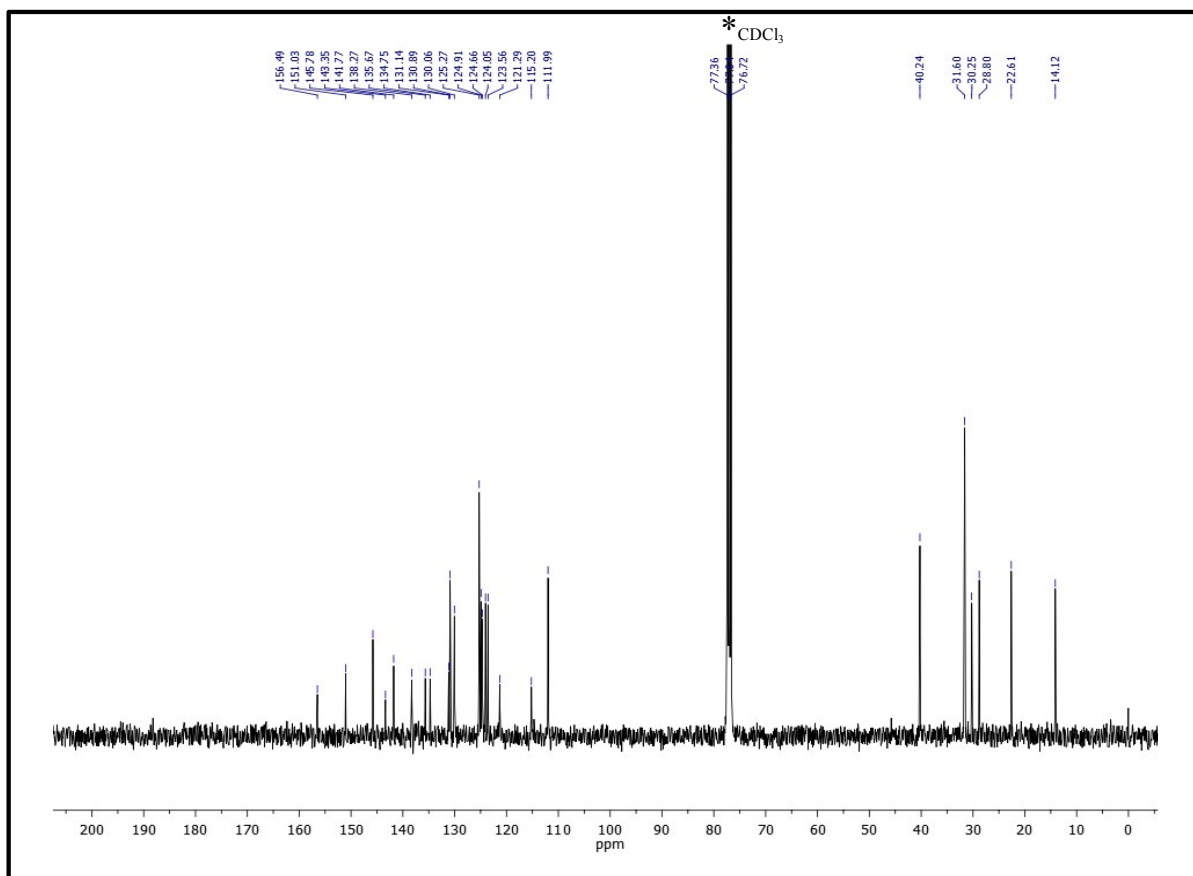

### 3.2a <sup>1</sup>H NMR Spectrum of Aza-Fhdt in CDCl<sub>3</sub>

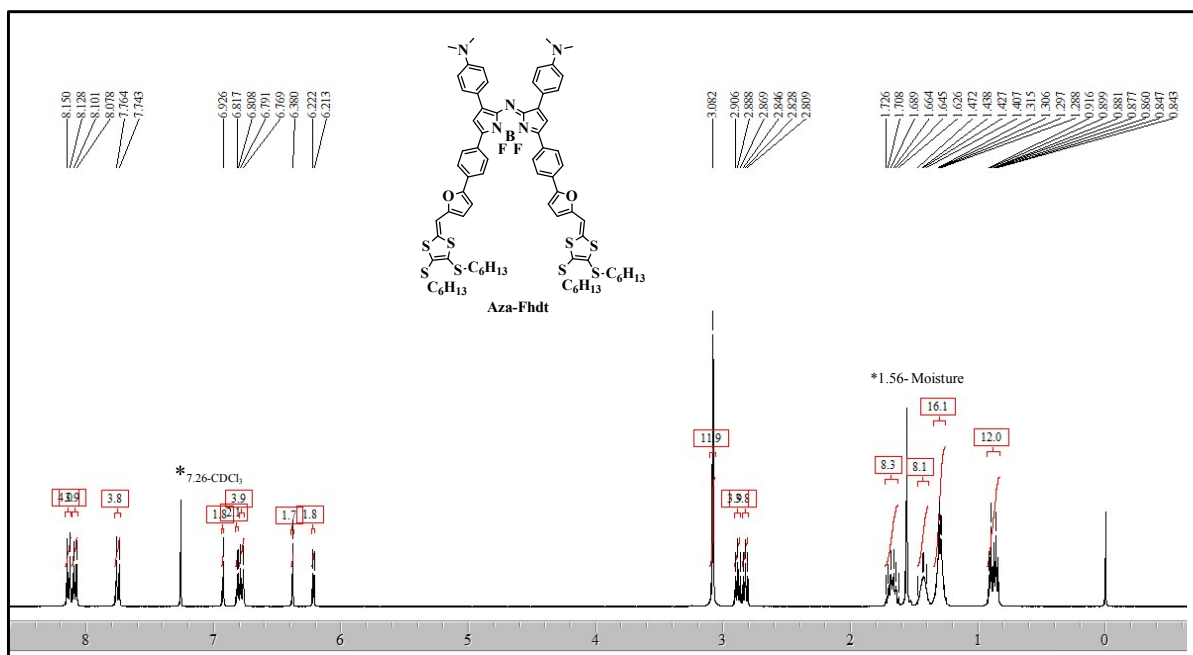

### 3.2b <sup>13</sup>C NMR Spectrum of Aza-Fhdt in CDCl<sub>3</sub>

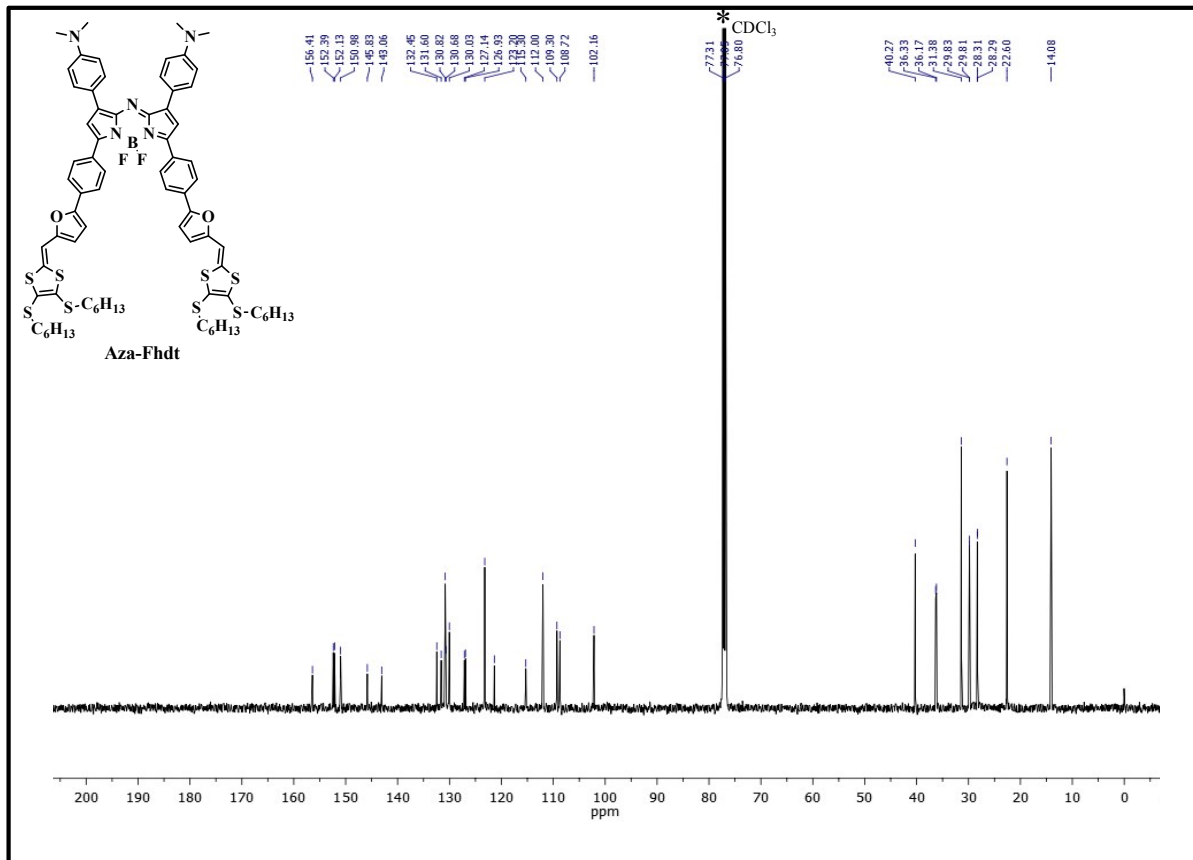

### 3.3a <sup>1</sup>H NMR Spectrum of Aza-Sty in CDCl<sub>3</sub>

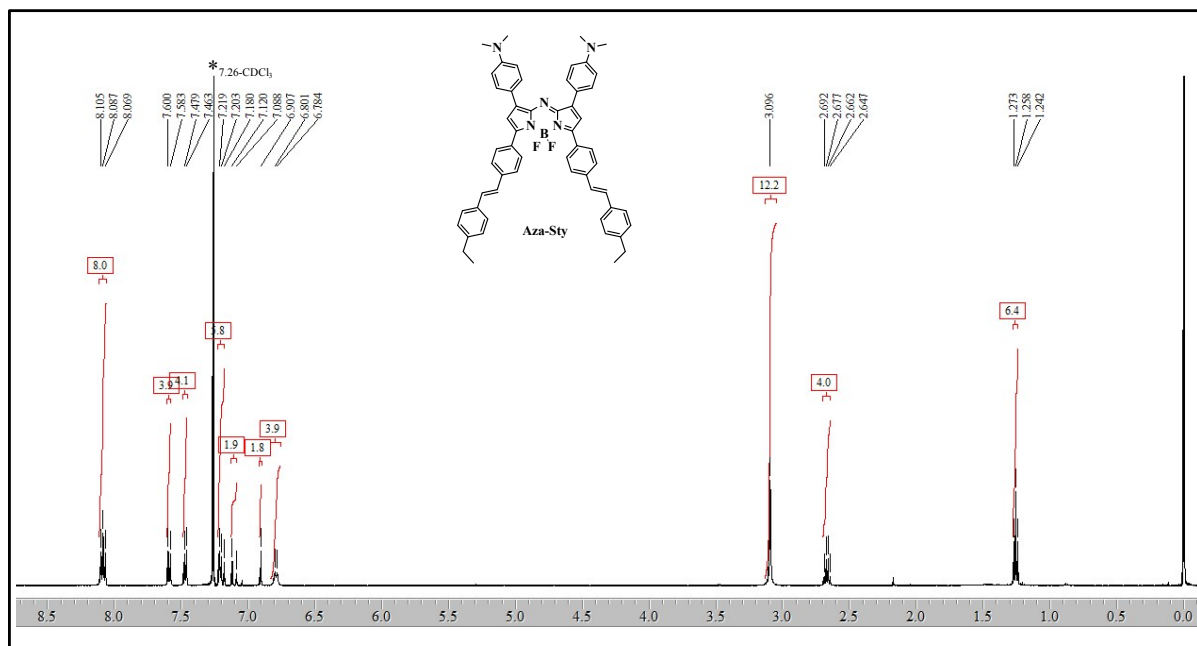

### 3.4a <sup>1</sup>H NMR Spectrum of Aza-FCHO in CDCl<sub>3</sub>

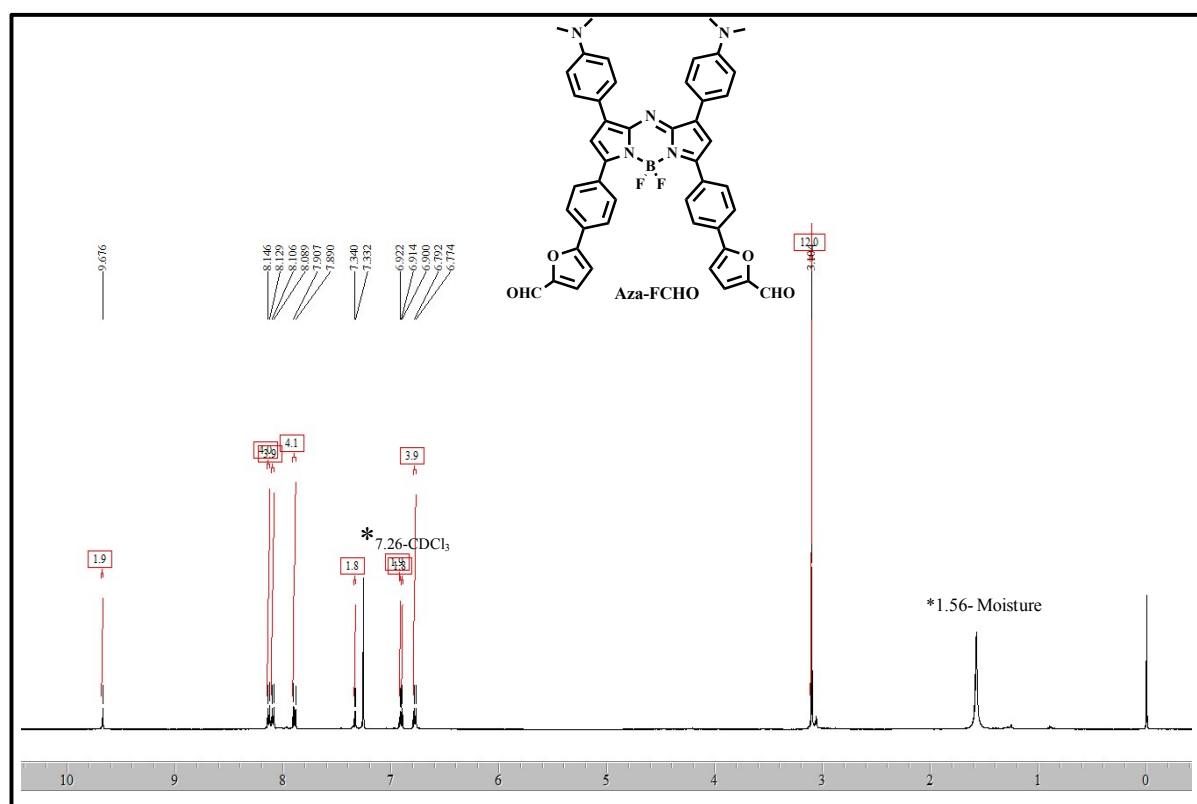

#### 4. MALDI-TOF spectra

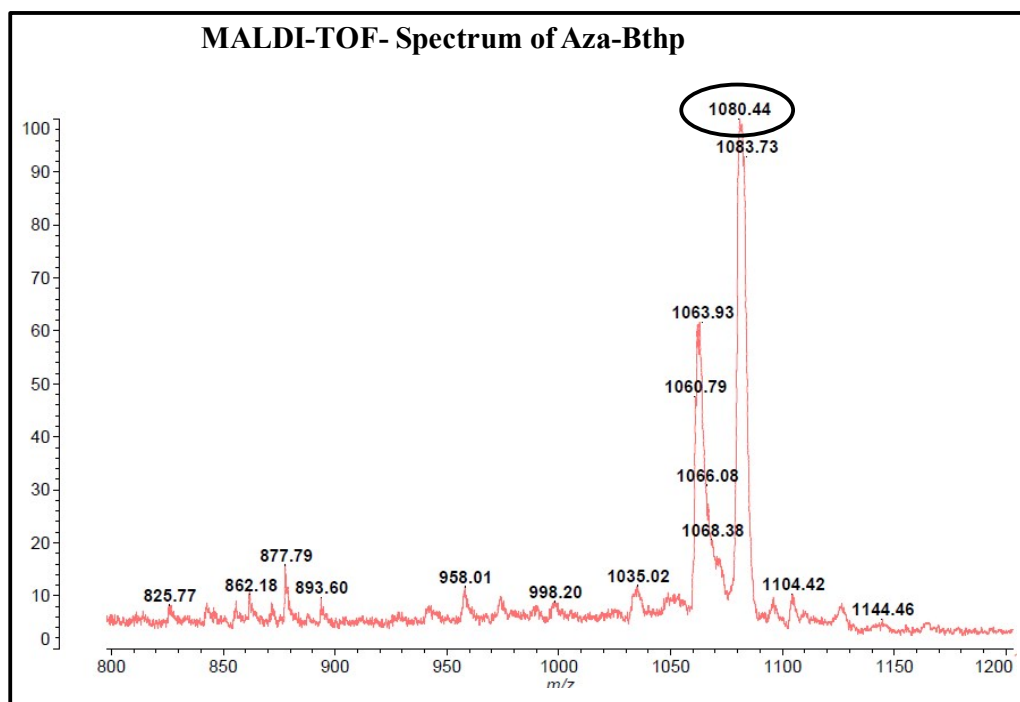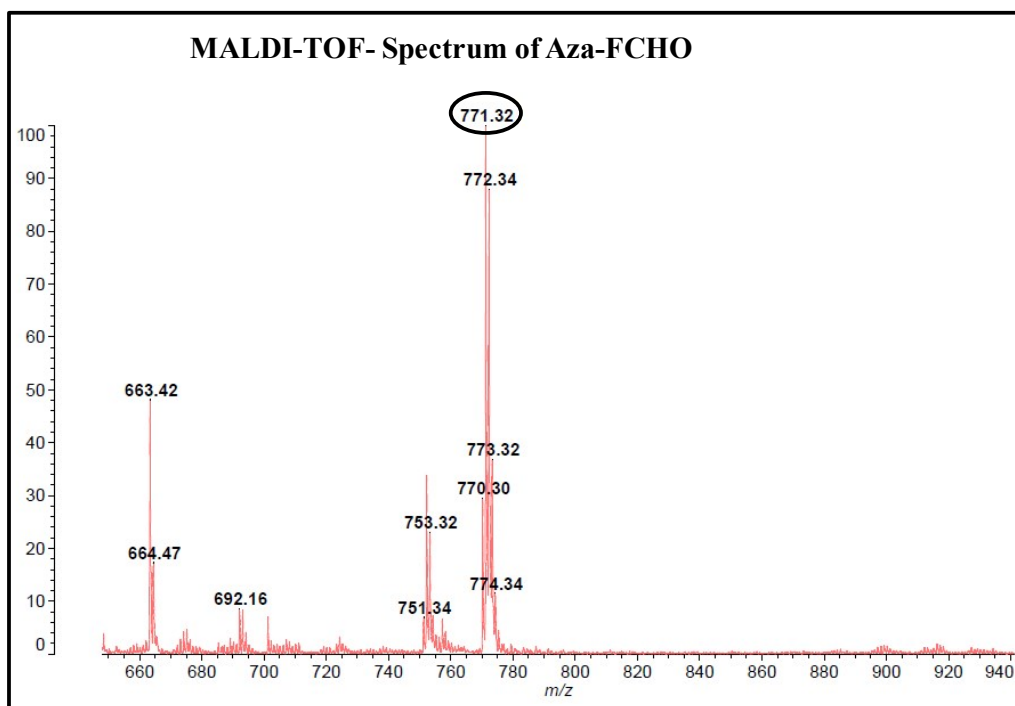

### MALDI-TOF- Spectrum of Aza-FHDT

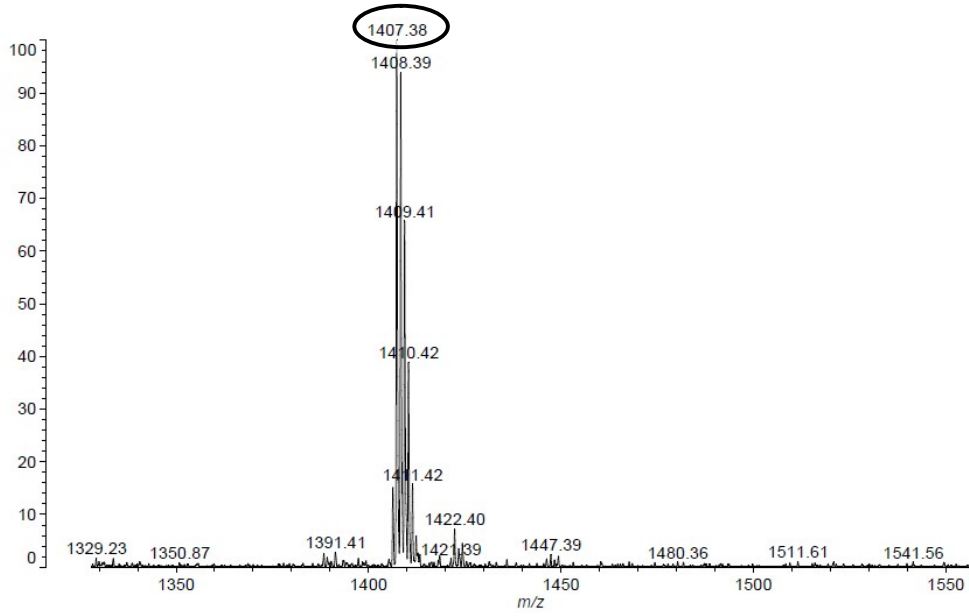

### MALDI-TOF- Spectrum of Aza-Sty

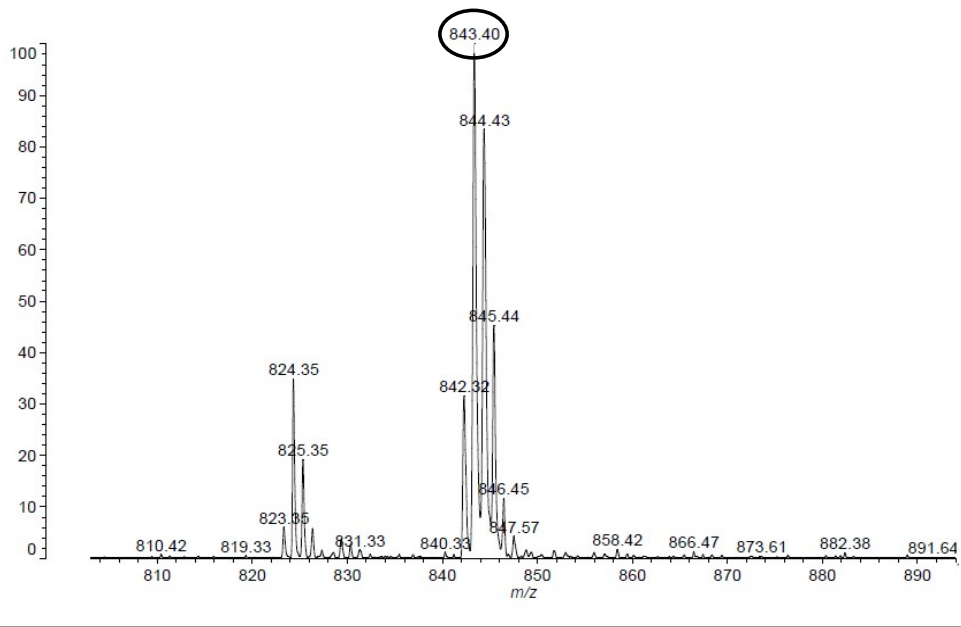

Supplement: d1nj00847a1.pdf [file d1nj00847a1.pdf]
